# Supplementary material for: The robust peroxidase mimics within metal–organic frameworks for the sensitivity detection of H2O2 and glucose in serum
Source: Royal Society of Chemistry journal article supplement (doi:10.1039/d1nj03318b), 2021-01-01
Supplement: d1nj03318b1.pdf [file d1nj03318b1.pdf]

## Supplementary Information

### **The robust peroxidase mimics within metal organic frameworks for the sensitivity detection of H<sub>2</sub>O<sub>2</sub> and glucose in serum**

Peipei Yang<sup>1,#</sup>, Qingfan Ren<sup>1,#</sup>, Yuying Chen<sup>1</sup>, Sixue Ouyang<sup>1</sup>, Zhipeng Huang<sup>1</sup>, Peng Zhao<sup>2,\*</sup>, Jia Tao<sup>1,\*</sup>

<sup>1</sup>School of Chemistry and Chemical Engineering, South China University of Technology, Guangzhou 510640, P. R. China

<sup>2</sup>Guangdong Provincial Key Laboratory of New Drug Screening, School of Pharmaceutical Sciences, Southern Medical University, Guangzhou 510515, P. R. China

# Peipei Yang and Qingfan Ren contributed equally to this work.

**Table S1.** Comparison of the kinetic parameters of CuPd@MIL-101, HRP and other nanozyme.

| <b>Catalyst</b>                    | <b>Substrate</b>              | <b><math>K_m</math></b> | <b>Ref</b> |
|------------------------------------|-------------------------------|-------------------------|------------|
| <b>HRP</b>                         | TMB                           | 0.434                   | 1          |
|                                    | H <sub>2</sub> O <sub>2</sub> | 3.70                    |            |
| <b>ZnFeO<sub>4</sub></b>           | TMB                           | 0.85                    | 2          |
|                                    | H <sub>2</sub> O <sub>2</sub> | 1.66                    |            |
| <b>Fe<sub>3</sub>O<sub>4</sub></b> | TMB                           | 0.098                   | 3          |
|                                    | H <sub>2</sub> O <sub>2</sub> | 154                     |            |
| <b>Ni-MOF</b>                      | TMB                           | 0.365                   | 4          |
|                                    | H <sub>2</sub> O <sub>2</sub> | 2.49                    |            |
| <b>FePPOP-1</b>                    | TMB                           | 0.064                   | 5          |
|                                    | H <sub>2</sub> O <sub>2</sub> | 13.33                   |            |
| <b>S-rGO</b>                       | TMB                           | 0.374                   | 6          |
|                                    | H <sub>2</sub> O <sub>2</sub> | 0.594                   |            |
| <b>HSA@PDA/Fe</b>                  | TMB                           | 0.585                   | 7          |
|                                    | H <sub>2</sub> O <sub>2</sub> | 0.129                   |            |
| <b>Pt NCs</b>                      | TMB                           | 0.096                   | 8          |
|                                    | H <sub>2</sub> O <sub>2</sub> | 3.07                    |            |
| <b>This Work</b>                   | TMB                           | 0.1153                  |            |
|                                    | H <sub>2</sub> O <sub>2</sub> | 0.26                    |            |

**Table S2.** Comparison of different nanozymes for H<sub>2</sub>O<sub>2</sub> detection in terms of linear range and LOD.

| <b>nanozyme</b>                                       | <b>Linear range<br/>(<math>\mu\text{M}</math>)</b> | <b>LOD (<math>\mu\text{M}</math>)</b> | <b>Ref</b> |
|-------------------------------------------------------|----------------------------------------------------|---------------------------------------|------------|
| <b>HSA@PDA/Fe</b>                                     | 0 -100                                             | 0.062                                 | 7          |
| <b>FeCo@C</b>                                         | 1-240                                              | 1                                     | 9          |
| <b>S-rGO</b>                                          | 0.1-1                                              | 0.042                                 | 6          |
| <b>Pt NCs</b>                                         | 0-200                                              | 0.46                                  | 8          |
| <b>MoS<sub>2</sub>-Pt<sub>74</sub>Ag<sub>26</sub></b> | 1-50                                               | 0.4                                   | 10         |
| <b>Fe<sub>3</sub>O<sub>4</sub>@MIL-100(Fe)</b>        | 0.2-30                                             | 0.089                                 | 11         |
| <b>MOF(Co/2Fe)</b>                                    | 10-100                                             | 5                                     | 12         |
| <b>This work</b>                                      | 0.25-700 $\mu\text{M}$                             | 0.043                                 |            |

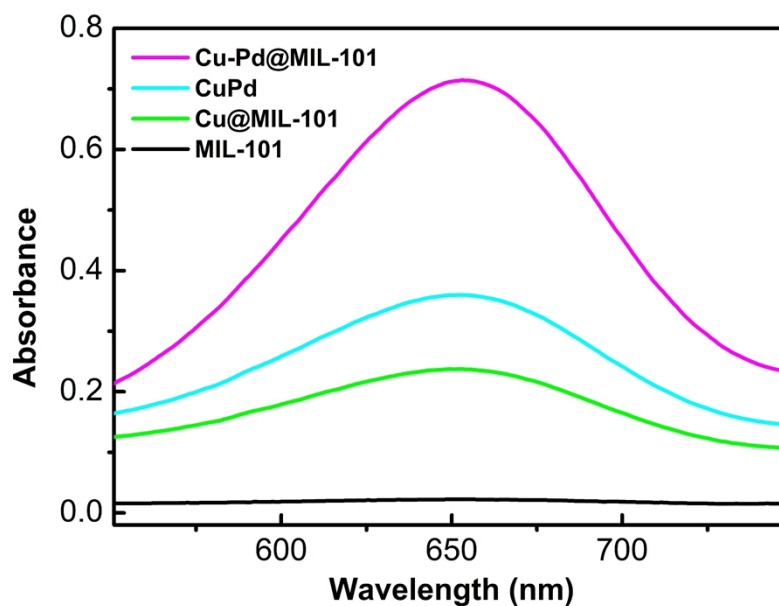

**Figure S1.** UV-Vis spectra of TMB + H<sub>2</sub>O<sub>2</sub> with different materials: CuPd@MIL-101, CuPd, Cu@MIL-101 and MIL-101. ([TMB] = 0.5 mM; [H<sub>2</sub>O<sub>2</sub>] = 10 mM; CuPd@MIL-101, CuPd, Cu@MIL-101 and MIL-101: 10 μg mL<sup>-1</sup>)

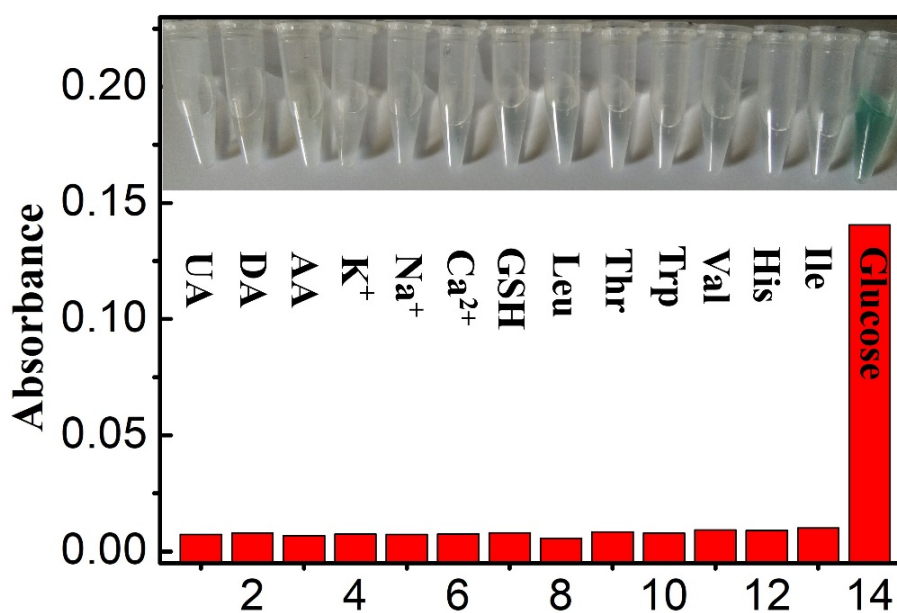

**Figure S2.** Selectivity analysis of system for the detection of glucose with common interferences. (Concentration of glucose and interferences: 400 μM).

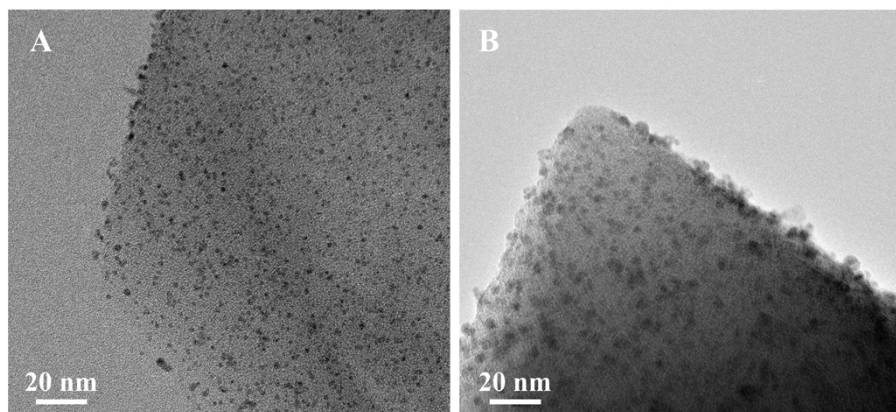

**Figure S3.** TEM images of CuPd@MIL-101(A) before and (B) after catalysis

## References

- [1] D. Porter, J. Bright and J. Biol. Chem., 1982, **258**, 9913-9924.
- [2] L. Su, J. Feng, X. Zhou, C. Ren, H. Li and X. Chen. Anal. Chem., 2012, **84**, 5753-5758.
- [3] L. Gao, J. Zhuang, L. Nie, J. Zhang, Y. Zhang, N. Gu, T. Wang, J. Feng, D. Yang, S. Perrett and X. Yan. Nat. Nanotech., 2007, **2**, 577-583.
- [4] J. Chen, Y. Shu, H. Li, Q. Xu and X. Hu. Talana, 2018, **189**, 254-261.
- [5] C. Cui, Q. Wang, Q. Liu, X. Deng, T. Liu, D. Li and X. Zhang. Sens. Actuato. B. Chem., 2018, **277**, 86-94.
- [6] K. Wu, Y. Feng, Y. Li, L. Li, R. Liu and L. Zhu. Anal. Bioanal. Chem., 2020, **412**, 5477-5487.
- [7] X. Liu, J. Qin, X. Zhang, L. Zou, X. Yang, Q. Wang, Y. Zheng, W. Mei and K. Wang. Nanoscale, 2020, Advance Article.
- [8] L. Jin, Z. Meng, Y. Zhang, S. Cai, Z. Zhang, C. Li, L. Shang and Y. Shen. ACS Appl. Mater. Interfaces., Just Accepted Manuscript.
- [9] T. Wu, Z. Ma, P. Li, Q. Lu, M. Liu, H. Li, Y. Zhang and S. Yao. Sensor. Actuato. B. Chem., 2019, **290**, 357-363.
- [10] S. Cai, Q. Han, C. Qi, Z. Lian, X. Jia, R. Yang and C. Wang. Nanoscale, 2016, **8**, 3685-3693.
- [11] Y. Wu, Y. Ma, G. Xu, F. Wei, Y. Ma and Q. Song. Sensor. Actuato. B. Chem.,

2017, **249**, 195-202.

[12] H. Yang, R. Yang, P. Zhang, Y. Qin, T. Chen and F. Ye. *Microchim. Acta.*, 2017, **184**, 4629-4635.
